# Supplementary material
Source: publisher figshare collection journal article supplement (https://tandf.figshare.com/ndownloader/files/12319316)
Supplement: Supplementary file 1 [file 12319316]

|  | | | **Locality** | **campus** |  |  |  |  |  |  |  | **Peña Apartada** |  |  |  |
| --- | --- | --- | --- | --- | --- | --- | --- | --- | --- | --- | --- | --- | --- | --- | --- |
| **Bait** | **chicken** |  |  |  | **Pig** |  |  |  |  |  |  |  |
| **Suborder** | **Family** | **Species** | **Season** | **autumn** | **winter** | **spring** | **summer** | **autumn** | **winter** | **spring** | **summer** | **autumn** | **winter** | **spring** | **summer** |
| Brachycera | Antomyiidae |  |  | 8 | 26 | 15 | 1 | 0 | 0 | 0 | 0 | 0 | 0 | 0 | 0 |
| Calliphoridae | *Calliphora vicina* |  | 32 | 171 | 12 | 2 | 12 | 95 | 9 | 0 | 792 | 260 | 163 | 693 |
| *Calliphora vomitoria* |  | 0 | 3 | 0 | 0 | 0 | 0 | 1 | 0 | 11 | 9 | 105 | 243 |
| *Chrysomya albiceps* |  | 918 | 2 | 13 | 111 | 0 | 0 | 602 | 1493 | 2737 | 0 | 0 | 1404 |
| *Lucilia caesar* |  | 0 | 0 | 0 | 0 | 0 | 0 | 0 | 0 | 8 | 0 | 0 | 0 |
| *Lucilia sp,* |  | 0 | 0 | 0 | 0 | 0 | 0 | 1 | 0 | 0 | 0 | 0 | 0 |
| *Lucilia sericata* |  | 94 | 6 | 465 | 54 | 1 | 0 | 422 | 109 | 12 | 0 | 0 | 52 |
| *Pollenia* |  | 0 | 0 | 1 | 0 | 0 | 0 | 0 | 0 | 0 | 0 | 0 | 0 |
| *atramentaria* |
| *Pollenia rudis* |  | 0 | 5 | 3 | 1 | 0 | 0 | 0 | 0 | 0 | 0 | 0 | 0 |
| *Pollenia sp,* |  | 0 | 0 | 0 | 0 | 0 | 0 | 0 | 0 | 57 | 0 | 0 | 19 |
| Camilidae |  |  | 0 | 0 | 0 | 0 | 0 | 0 | 0 | 0 | 1 | 0 | 0 | 2 |
| Carmidae |  |  | 0 | 0 | 0 | 0 | 0 | 0 | 0 | 0 | 14 | 0 | 0 | 8 |
| Chloropidae |  |  | 0 | 0 | 0 | 0 | 0 | 0 | 0 | 0 | 5 | 0 | 0 | 3 |
| Clusiidae |  |  | 0 | 0 | 0 | 0 | 0 | 0 | 0 | 0 | 2 | 0 | 0 | 0 |
| Drosophilidae |  |  | 0 | 0 | 0 | 0 | 0 | 0 | 0 | 0 | 1 | 0 | 0 | 25 |
| Fanniidae | *Fannia canicularis* |  | 15 | 14 | 8 | 1 | 0 | 0 | 0 | 0 | 0 | 0 | 0 | 0 |
| *Fannia difficilis* |  | 9 | 0 | 1 | 3 | 0 | 0 | 0 | 0 | 0 | 0 | 0 | 0 |
| *Fannia glaucescen* |  | 239 | 0 | 1 | 9 | 0 | 0 | 0 | 0 | 0 | 0 | 0 | 0 |
| *Fannia sp,* |  | 10 | 3 | 1 | 0 | 0 | 0 | 0 | 0 | 0 | 0 | 0 | 0 |
| *Fannia* |  | 6 | 10 | 0 | 0 | 0 | 0 | 0 | 0 | 0 | 0 | 0 | 0 |
| *subpubescens cf,* |
| Fanniidae |  | 0 | 0 | 0 | 2 | 0 | 0 | 97 | 93 | 161 | 0 | 1 | 2153 |
| unidentified |
| Heleomyzidae |  |  | 0 | 0 | 0 | 0 | 0 | 0 | 0 | 0 | 16 | 0 | 0 | 105 |
| Muscidae | *Alloeostylus sp,* |  | 14 | 1 | 0 | 1 | 0 | 0 | 0 | 0 | 0 | 0 | 0 | 0 |
| *Musca domestica* |  | 115 | 0 | 22 | 237 | 0 | 0 | 5687 | 1808 | 0 | 0 | 0 | 0 |
| *Muscina assimilis* |  | 1 | 1 | 1 | 0 | 0 | 0 | 0 | 0 | 0 | 0 | 0 | 0 |
| *Muscina pabulorum* |  | 2 | 3 | 0 | 0 | 0 | 0 | 0 | 0 | 0 | 0 | 0 | 0 |
| *Muscina stabulans* |  | 147 | 82 | 115 | 58 | 6 | 0 | 112 | 139 | 0 | 0 | 0 | 0 |
| Muscidae |  | 0 | 0 | 0 | 0 | 0 | 0 | 68 | 31 | 0 | 6 | 2 | 835 |
| unidentified |
| Odiniidae |  |  | 0 | 0 | 0 | 0 | 0 | 0 | 0 | 2 | 0 | 0 | 0 | 0 |
| Phoridae |  |  | 27 | 29 | 90 | 44 | 6 | 10 | 16 | 0 | 22 | 8 | 1 | 33 |
| Piophilidae |  |  | 0 | 0 | 0 | 0 | 0 | 0 | 0 | 0 | 41 | 1 | 0 | 7 |
|  | *Bercaea africa* |  | 0 | 0 | 3 | 0 | 0 | 0 | 0 | 0 | 0 | 0 | 0 | 0 |
| *Curranea tibialis* |  | 0 | 0 | 2 | 0 | 0 | 0 | 0 | 0 | 0 | 0 | 0 | 0 |
| *Hellicophagela hirticrus* |  | 0 | 0 | 1 | 0 | 0 | 0 | 0 | 0 | 0 | 0 | 0 | 0 |
| *Pandelleola filia* |  | 0 | 0 | 0 | 0 | 0 | 0 | 0 | 0 | 0 | ,0 | 0 | 0 |
| *Sarcophila sp,* |  | 0 | 0 | 6 | 0 | 0 | 0 | 0 | 0 | 0 | 0 | 0 | 0 |
| Sarcophagidae |  | 91 | 1 | 39 | 115 | 0 | 0 | 49 | 176 | 68 | 0 | 0 | 166 |
| unidentified |
| Scatophagidae |  |  | 1 | 0 | 6 | 2 | 0 | 0 | 0 | 0 | 0 | 0 | 0 | 0 |
| Sphaeroceridae |  |  | 0 | 2 | 57 | 2 | 0 | 0 | 0 | 0 | 23 | 2 | 3 | 3 |
| Syrphidae |  |  | 0 | 0 | 0 | 0 | 0 | 0 | 0 | 0 | 1 | 0 | 0 | 0 |
| Tachinidae |  |  | 0 | 0 | 0 | 0 | 0 | 0 | 1 | 0 | 14 | 0 | 0 | 29 |
| Brachycera |  |  | 17 | 8 | 38 | 1 | 0 | 0 | 0 | 0 | 0 | 0 | 0 | 0 |
| unidentified |
| Nematocera | Cecidomyiidae |  |  | 42 | 4 | 20 | 12 | 0 | 0 | 0 | 0 | 0 | 0 | 2 | 0 |
| Chironomidae |  |  | 0 | 0 | 0 | 0 | 1 | 0 | 0 | 1 | 0 | 0 | 0 | 0 |
| Culicidae |  |  | 0 | 0 | 0 | 1 | 0 | 0 | 0 | 0 | 0 | 0 | 0 | 0 |
| Empididae |  |  | 0 | 0 | 0 | 0 | 0 | 0 | 0 | 0 | 0 | 0 | 2 | 6 |
| Ephydridae |  |  | 0 | 0 | 0 | 0 | 0 | 0 | 0 | 0 | 0 | 0 | 0 | 4 |
| Milichiidae |  |  | 0 | 0 | 0 | 0 | 0 | 1 | 0 | 0 | 0 | 0 | 0 | 0 |
| Mycetophilidae |  |  | 0 | 0 | 0 | 0 | 0 | 0 | 0 | 0 | 0 | 33 | 1 | 0 |
| Psychodidae |  |  | 13 | 4 | 25 | 5 | 5 | 1 | 3 | 0 | 0 | 0 | 0 | 0 |
| Sciaridae |  |  | 5 | 16 | 119 | 3 | 6 | 4 | 4 | 0 | 0 | 12 | 4 | 0 |
| Scatopsidae |  |  | 0 | 0 | 0 | 0 | 0 | 0 | 0 | 0 | 0 | 2 | 0 | 0 |
| Tipulidae |  |  | 0 | 0 | 1 | 0 | 0 | 0 | 0 | 0 | 0 | 0 | 0 | 0 |
| Trixoscelididae |  |  | 0 | 0 | 0 | 0 | 0 | 0 | 0 | 0 | 15 | 0 | 0 | 59 |
| Nematocera |  |  | 5 | 5 | 27 | 2 | 0 | 0 | 0 | 0 | 0 | 0 | 7 | 0 |
| unidentified |
